# Supplementary material for: Intramolecular hydrophobic interactions are critical mediators of STAT5 dimerization
Source: PubMed Central journal article supplement (PMC5067585; doi:10.1038/srep35454), 2016-10-18

## Supplementary Information

### **Intramolecular hydrophobic interactions are critical mediators of STAT5 dimerization**

Dirk Fahrenkamp, Jinyu Li, Sabrina Ernst, Hildegard Schmitz-Van de Leur, Nicolas Chatain, Andrea Küster, Steffen Koschmieder, Bernhard Lüscher, Giulia Rossetti, Gerhard Müller-Newen

**a**

|        |     |                                                            |     |
|--------|-----|------------------------------------------------------------|-----|
| STAT1  | 573 | WNDGCIMGFISKERERALLKDQPGTFLLLRFSESSREGAIFTTWERSQNGGEPDFH   | 629 |
| STAT3  | 580 | WNEGIMGFISKERERAILSTKPPGTFLLLRFSESSKEGGVFTWVEKDI-SGKTQIQ   | 635 |
| STAT5A | 589 | WNDGAILGFVNKQQAHDLLINKPDGTFLLLRFSDS-EIGGITIAWKF--D-SPERNLW | 641 |
|        |     | **:* *:*:*.*:: : :* : *****:* . *:*:*:* . : : :            |     |
|        |     | <b>SH2</b>                                                 |     |
| STAT1  | 630 | AVEPYTKKELSAVTFPIIRNYKVMAAENIPENPLKYL YPNIDKDHFAGKYYSRPKE  | 686 |
| STAT3  | 636 | SVEPYTKQLNNSFAEIIIMGYKIMDATNILVSPLVYL YPDIPKEEAFGKYCR-PES  | 691 |
| STAT5A | 642 | NLKPFTTRDFSIRSLADRLGD-----LSYLIYVFPDRPKDEVFSKYIT-PVL       | 687 |
|        |     | ::*:* .: : . : : : : . * * : * : * : . : . * * *           |     |
|        |     | <b>SH2</b>                                                 |     |
| STAT1  | 687 | APEPMELDGPKGTYIKTELISVSEVHPSRLQTT--D                       | 721 |
| STAT3  | 692 | QEH-PEADPGSAAPYLKTKFICVTPTTCS--NTIDL P                     | 725 |
| STAT5A | 688 | AK-----AVDGYVKPQIKQVPEFVN--ASADAG                          | 714 |
|        |     | *:* . : : * . . . .                                        |     |
|        |     | <b>CTS</b>                                                 |     |
|        |     | L                      PTM                      nTAD       |     |

**b**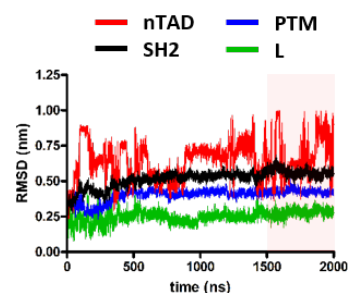**c**

|        |     |                                                       |            |             |           |           |
|--------|-----|-------------------------------------------------------|------------|-------------|-----------|-----------|
|        |     | <b>αA</b>                                             | <b>βB</b>  | <b>βC</b>   |           |           |
| STAT5A | 589 | WNDGAILGFVNKQQAHDLLINKPDGTFLLLRFSDSEIGGITIAWKFDSPERNL | 640        |             |           |           |
| STAT5B | 589 | WNDGAILGFVNKQQAHDLLINKPDGTFLLLRFSDSEIGGITIAWKFDSPERNL | 640        |             |           |           |
|        |     | *****                                                 |            |             |           |           |
|        |     | <b>SH2</b>                                            |            |             |           |           |
|        |     | <b>βD</b>                                             | <b>αB'</b> | <b>αB</b>   | <b>αC</b> | <b>αD</b> |
| STAT5A | 641 | WNLKPFITTRDFSIRSLADRLGDLSYLIYVFPDRPKDEVFSKYITPV-----L | 687        |             |           |           |
| STAT5B | 641 | WNLKPFITTRDFSIRSLADRLGDLSYLIYVFPDRPKDEVFSKYITPV-----L | 692        |             |           |           |
|        |     | *****                                                 |            |             |           |           |
|        |     | <b>SH2</b>                                            |            |             |           |           |
|        |     | <b>αE</b>                                             |            |             |           |           |
| STAT5A | 688 | AKAVDGYVKPQIKQVPEFVNASADAG                            | 714        |             |           |           |
| STAT5B | 693 | AKAVDGYVKPQIKQVPEFVNASADAG                            | 719        |             |           |           |
|        |     | *****                                                 |            |             |           |           |
|        |     | <b>L</b>                                              | <b>PTM</b> | <b>nTAD</b> |           |           |

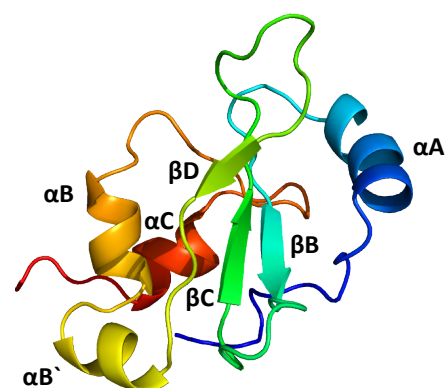

## Supplementary Figure 1

### Sequence similarities of STAT SH2 domains and structural features of the STAT5A SH2 domain.

(a) Sequence similarity between the SH2 domains of human STAT1, STAT3 and STAT5A. Multiple sequence alignment of the indicated SH2 domains and the C-terminal tail segment (CTS) including the linker (L), phosphotyrosine motif (PTM) and N-terminal part of the TA domain (nTAD), was performed using T-Coffee<sup>6</sup>. (\*) conserved residues (: ) strong similarity (.) weak similarity.

(b) Backbone atoms` RMSD (in nm) relative to the initial structure of the activated STAT5A dimer interface for the SH2 domains (black line), L (green line), PTM (blue line) and nTAD (red line) of M1 and M2 as a function of simulation time. Red area: Time windows of the MD simulation used to generate the most representative model by cluster analysis.

(c) Left: Sequence alignment and secondary structure elements of the human STAT5A (PDB ID: 1y1u) and STAT5B SH2 domains. (\*) conserved residues, (: ) strong similarity, (.) weak similarity. Right: Rainbow representation of the ribbon structure of the modelled STAT5A SH2 domain (representative model). The core of the activated STAT5A SH2 domain (residues: 589-687) features a central anti-parallel β-sheet (βB, βC and βD) flanked by adjacent α-helices (αA, αB', αB, αC and αD). With the exception of the presence of α-helix αD, the above highlighted secondary structures are preserved in the crystalized SH2 domain of inactive STAT5A.



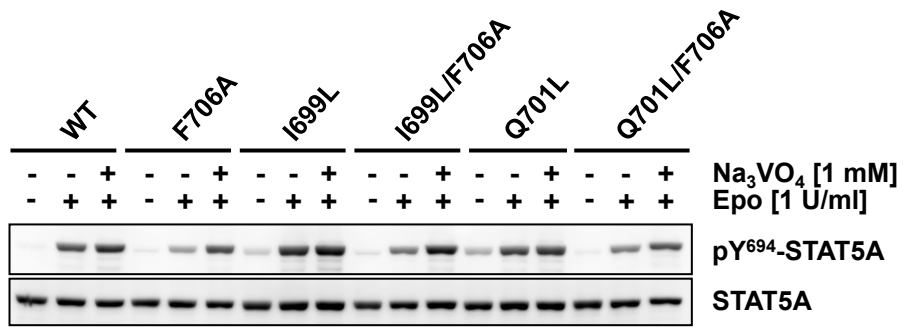

### Supplementary Figure 5

The F706A mutation attenuates the phosphorylation of Y694 in STAT5A<sup>I699L</sup> and STAT5A<sup>Q701L</sup>. HeLa T-REx HA-EpoR cells stably expressing the indicated STAT5A-eYFP fusion proteins were treated with 1 mM sodium vanadate for 1.5 h or left untreated. Stimulation was carried out using 1 U/ml Epo for 30 min as indicated. Untreated cells served as controls. WCLs were analyzed for the phosphorylation status of STAT5A Y694.

### Supplementary Table 1.

Hess's cosine content analysis of three principal components (PC1-PC3) obtained from mass weighted covariance analysis<sup>4</sup>.

| ID  | Cosine content |
|-----|----------------|
| PC1 | 0.147          |
| PC2 | 0.126          |
| PC3 | 0.175          |

### Supplementary Table 2.

Residue interactions in the phosphotyrosine-SH2 domain interfaces of STAT5A

| ID  | Res. <sup>M1</sup> | Atom <sup>M1</sup> | Res. <sup>M2</sup> | Atom <sup>M2</sup> | Distance (nm) <sup>a</sup> | Distance (nm) <sup>b</sup> | Occupancy (%) <sup>c</sup> |
|-----|--------------------|--------------------|--------------------|--------------------|----------------------------|----------------------------|----------------------------|
| -   | pY694              |                    | K600               |                    |                            | 0.86 ± 0.27                | 10.0                       |
| h1  | pY694              | O1P                | R618               | NH1                | 0.33 *                     | 0.32 ± 0.01                | 100                        |
| h2  | pY694              | O1P                | R618               | NH2                | 0.28 *                     |                            |                            |
| h3  | pY694              | O3P                | R618               | NH1                | 0.29                       |                            |                            |
| h4  | pY694              | O3P                | R618               | NH2                | 0.35                       |                            |                            |
| h5  | pY694              | O3P                | S620               | OG                 | 0.33 *                     | 0.35 ± 0.04                | 89.2                       |
| h6  | pY694              | OG                 | S622               | OG                 | 0.30 *                     | 0.46 ± 0.15                | 66.5                       |
| h7  | pY694              | O2P                | S622               | OG                 | 0.26 *                     |                            |                            |
| h8  | pY694              | O3P                | T628               | OG1                | 0.25 *                     | 0.42 ± 0.02                | 10.3                       |
| n1  | pY694              | CD2                | N642               | CB                 | 0.35                       | 0.61 ± 0.03                | 100                        |
| n2  | pY694              | CD1                | K644               | CB                 | 0.50                       | 1.17 ± 0.06                | 39.8                       |
| h9  | K600               | NZ                 | pY694              | O1P                | 0.27 *                     | 0.47 ± 0.14                | 55.6                       |
| h9  | K600               | NZ                 | pY694              | O3P                | 0.35                       |                            |                            |
| h10 | R618               | NH2                | pY694              | OG                 | 0.28 *                     | 0.37 ± 0.01                | 97.0                       |
| h11 | R618               | NH1                | pY694              | O3P                | 0.28 *                     |                            |                            |
| h12 | R618               | NH2                | pY694              | O3P                | 0.29 *                     |                            |                            |
| h13 | S620               | OG                 | pY694              | O2P                | 0.25 *                     | 0.48 ± 0.12                | 42.7                       |
| h14 | S620               | OG                 | pY694              | O3P                | 0.34                       |                            |                            |
| -   | S622               |                    | pY694              |                    |                            | 0.67 ± 0.16                | 0.42                       |
| -   | T628               |                    | pY694              |                    |                            | 0.53 ± 0.03                | 0.10                       |
| n3  | N642               | CB                 | pY694              | CD1                | 0.50                       | 0.73 ± 0.08                | 84.6                       |
| n4  | K644               | CD                 | pY694              | CD2                | 0.35                       | 0.41 ± 0.03                | 100                        |

h: hydrogen bond

n: non-polar interaction

Res: Residue

M1/M2: Residues or atoms belong to monomer 1 / monomer 2

\*: Hydrogen bonds illustrated in Fig. 2A.

a: Atom distances (h1-h14), calculated from the most representative model of the MD simulation

b: COM distances ± standard deviation (SD), calculated on the equilibrium trajectory of the MD simulation

c: Occupancy of the formation of hydrogen bonds across the equilibrium trajectory

### Supplementary Table 3.

#### SH2 domain residues coordinating phosphotyrosine in STAT1, STAT3 and STAT5A

| Pos.         | STAT5A | STAT1 | STAT3 |
|--------------|--------|-------|-------|
| $\alpha$ A2  | K600   | K584  | K591  |
| $\beta$ B5   | R618   | R602  | R609  |
| $\beta$ B7   | S620   | S604  | S611  |
| BC1          | D621   | -     | E612  |
| BC2          | S622   | S606  | S613  |
| $\beta$ C1 * | T628   | T613  | S620  |
| $\beta$ D5 * | N642   | A630  | S636  |
| $\beta$ D7 * | K644   | E632  | E638  |

Modified from Gianti & Zauhar 2015 J Comput Aided Mol Des 29, 451-70

Residue annotation according to Songyan et al. 1993 Cell 72, 767-78; Sheinerman et al. 2003, J Mol Biol 334, 823-41

### Supplementary Table 4.

#### Hydrogen bonds in the PTM-PTM interface of STAT5A

| ID | Res. <sup>M1</sup> | Atom <sup>M1</sup> | Res. <sup>M2</sup> | Atom <sup>M2</sup> | Distance (nm) <sup>a</sup> | Occupancy (%) <sup>b</sup> |
|----|--------------------|--------------------|--------------------|--------------------|----------------------------|----------------------------|
| h1 | Q698               | N                  | Q701               | O                  | 0.29 ± 0.01                | 99.9                       |
| h2 | Q698               | O                  | Q701               | NE2                | 0.29 ± 0.01                | 99.9                       |
| h3 | K700               | O                  | Q701               | NE2                | 0.29 ± 0.02                | 99.0                       |
| h4 | E705               | OE1                | I699               | N                  | 0.34 ± 0.05                | 62.7                       |
| h5 | E705               | OE2                | Q698               | N                  | 0.33 ± 0.06                | 72.9                       |

h: Hydrogen bond interactions, Res: Residue

a: Atom distances (h1-h5) + SD, calculated on the equilibrium trajectory of the MD simulation

b: Occupancy of the formation of hydrogen bonds (donor-acceptor distance below 0.35 nm and angle among the hydrogen-donor-acceptor atoms below 30 degree) across the equilibrium trajectory

### Supplementary Table 5.

#### Hydrophobic interactions in the PTM-PTM interface of STAT5A

| ID | Res. <sup>M1</sup> | Res. <sup>M2</sup> | Distance (nm) <sup>a</sup> | Occupancy (%) <sup>b</sup> |
|----|--------------------|--------------------|----------------------------|----------------------------|
| h1 | P697               | V702               | 0.42 ± 0.08                | 78.3                       |
| h2 | V702               | I699               | 0.44 ± 0.07                | 53.2                       |

h: Hydrophobic interactions, Res: Residue

a: COM distances (h1 and h2) + SD, calculated on the equilibrium trajectory of the MD simulation

b: Occupancy of the formation of hydrophobic interactions (COM distance below 0.45 nm) across the equilibrium trajectory

## Supplementary Table 6.

### Interactions of F706 with residues in the hydrophobic interface of the STAT5A SH2 domain

| ID | M | Res. <sup>1</sup> | Res. <sup>2</sup> | Distance (nm) <sup>a</sup> | Occupancy (%) <sup>b</sup> | Angle ( $\theta$ ) <sup>c</sup> |
|----|---|-------------------|-------------------|----------------------------|----------------------------|---------------------------------|
| h1 | 1 | F706              | W631              | $0.72 \pm 0.15$            | 5.4                        | $56.8 \pm 11.0$                 |
| h2 | 1 | F706              | F633              | $0.52 \pm 0.13$            | 55.1                       | $18.8 \pm 7.0$                  |
| h3 | 1 | F706              | W641              | $0.48 \pm 0.07$            | 60.0                       | $26.1 \pm 11.6$                 |
| -  | 1 | F706              | Y665              | $1.51 \pm 0.15$            | 0.0                        | -                               |
| h4 | 2 | F706              | W631              | $0.58 \pm 0.12$            | 21.7                       | $28.6 \pm 10.6$                 |
| h5 | 2 | F706              | F633              | $0.68 \pm 0.16$            | 41.4                       | $30.6 \pm 15.5$                 |
| -  | 2 | F706              | W641              | $1.04 \pm 0.12$            | 0.0                        | -                               |
| h6 | 2 | F706              | Y665              | $0.57 \pm 0.12$            | 41.3                       | $50.4 \pm 22.2$                 |

h: Hydrophobic interactions, Res: Residue

a: COM distances + SD, calculated on the equilibrium trajectory of the MD simulation

b: Occupancy of the formation of non-polar interactions across the equilibrium trajectory

c: Dihedral angle ( $\theta$ ) between stacking planar side chains. The planar side chains form parallel displaced stacking when  $\theta = 0^\circ$ ; T-shaped stacking when  $\theta = 90^\circ$ ; parallel staggered stacking when  $0^\circ < \theta < 90^\circ$ .

# Supplementary Information

## Full-length Western blots and gels

Figure 3c, upper panel

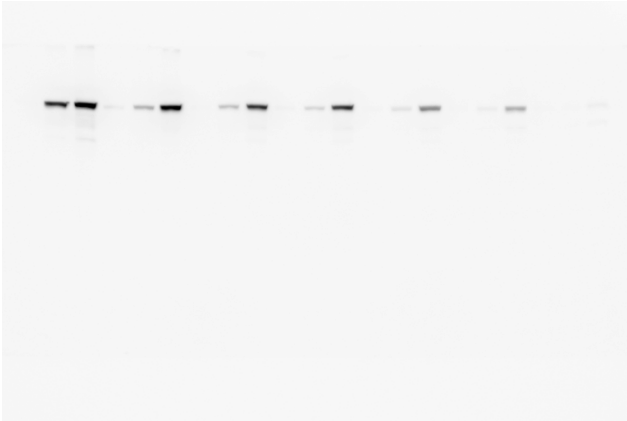

Figure 3c, lower panel

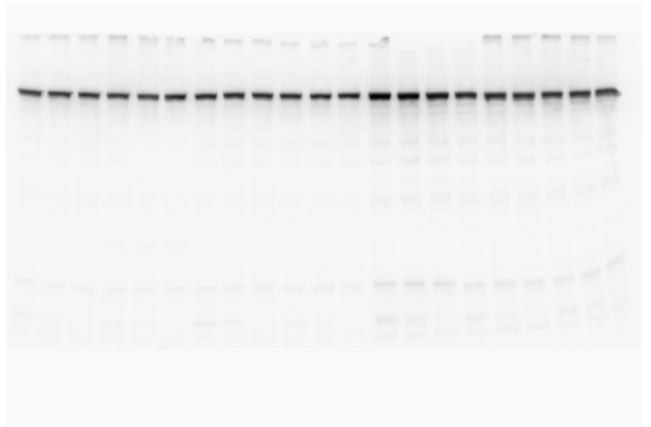

Figure 3d, upper panel (fluorescence scan of native PAGE to detect STAT5A-YFP)

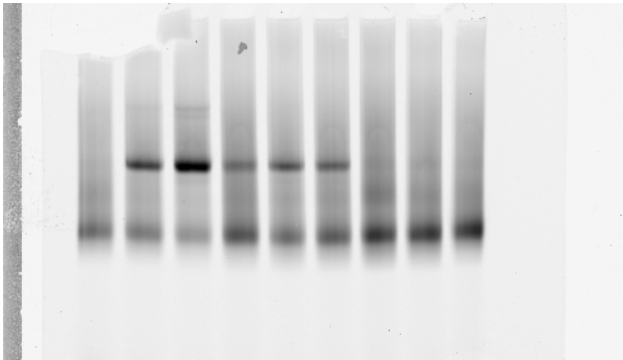

Figure 3d, middle panel

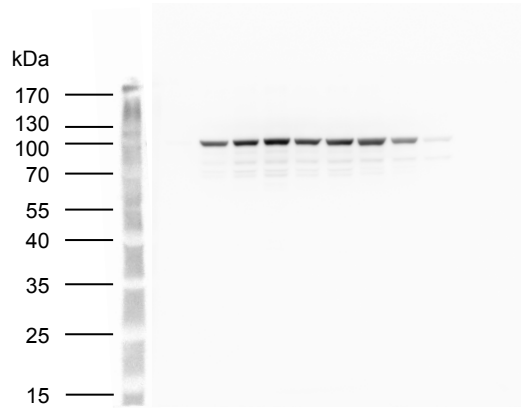

Figure 3d, lower panel

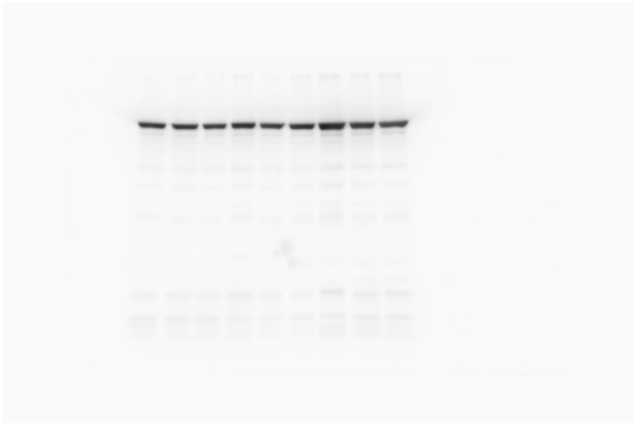

Figure 4b, left panel (N642H)

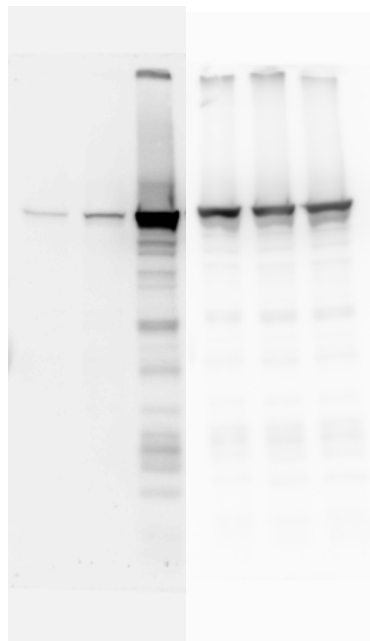

Figure 4b, right panel (T628S)

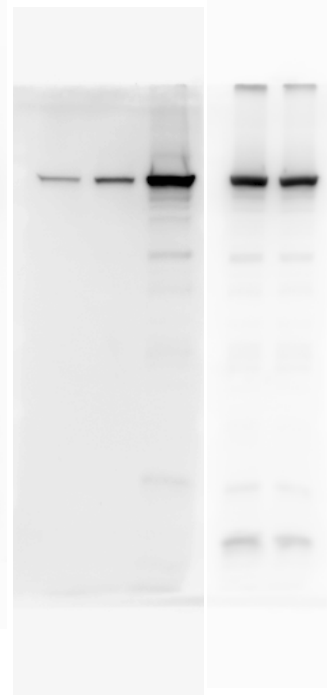



Figure 4c, upper panel (fluorescence scan of native PAGE to detect STAT5A-YFP)

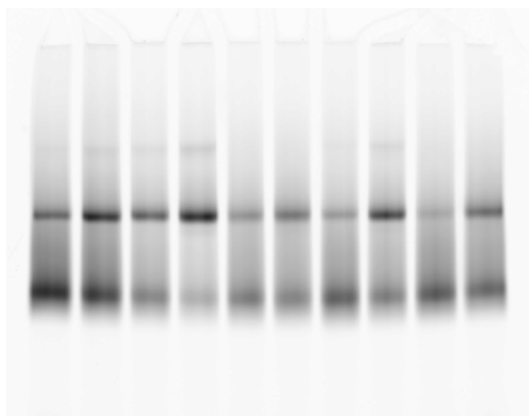

Figure 4c, middle panel

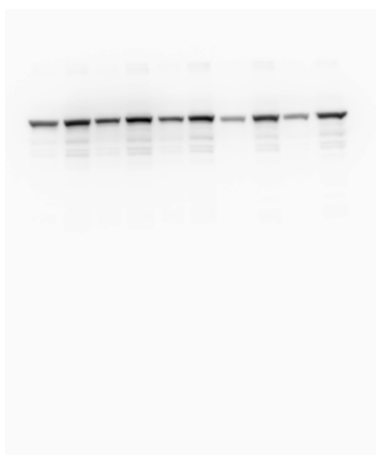

Figure 4c, lower panel

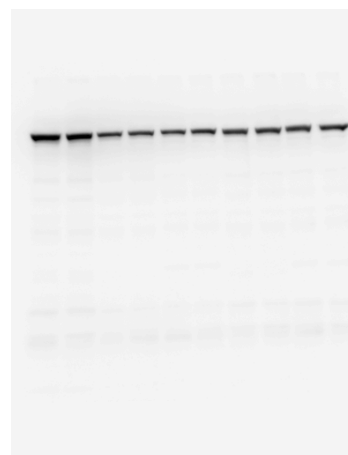

Figure 5b, upper panel (fluorescence scan of native PAGE to detect STAT5A-YFP)

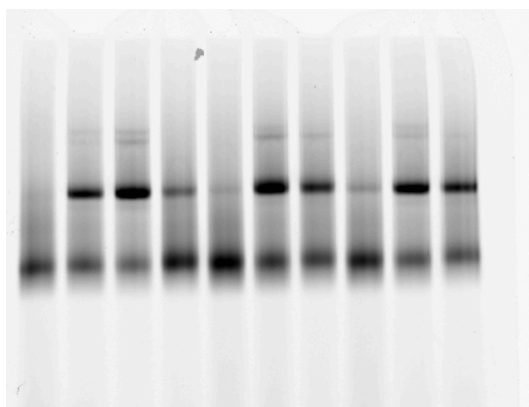

Figure 5b, middle panel

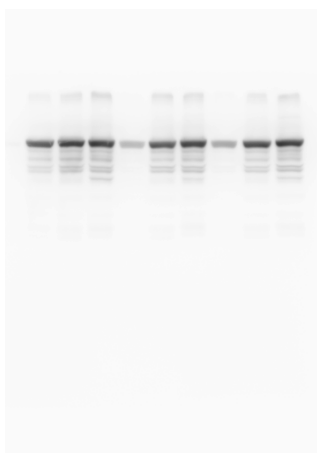

Figure 5b, lower panel

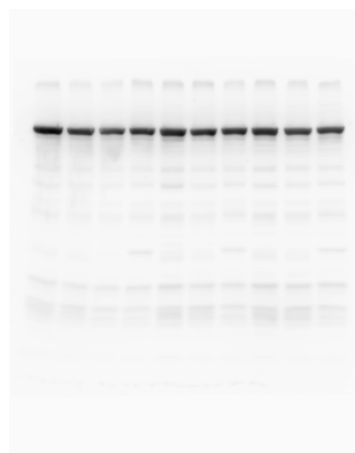

Figure 5d, upper panel

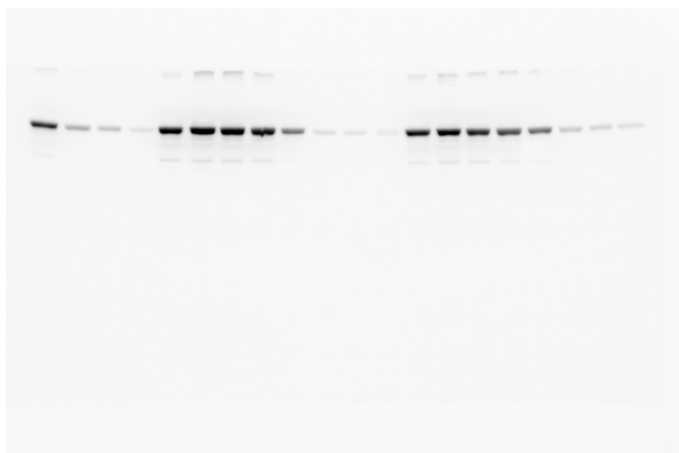

Figure 5d, lower panel

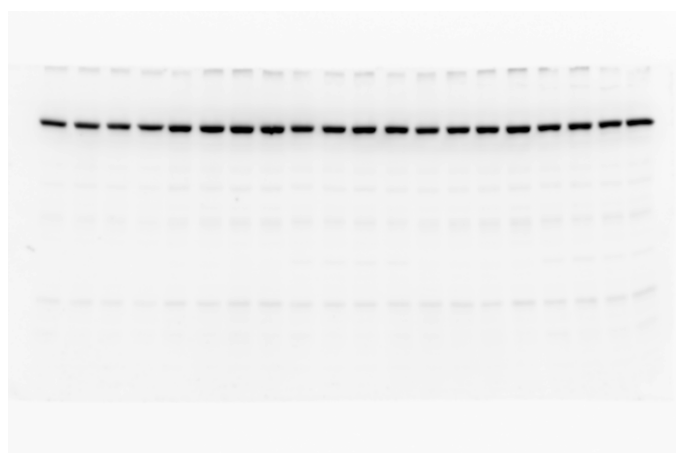

Figure 6b, upper panel (fluorescence scan of native PAGE to detect STAT5A-YFP)

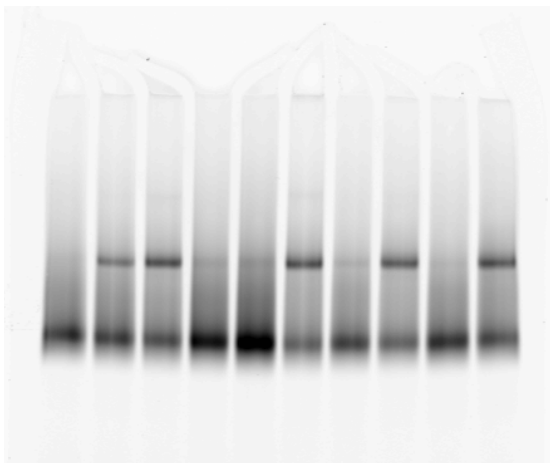

Figure 6b, middle panel

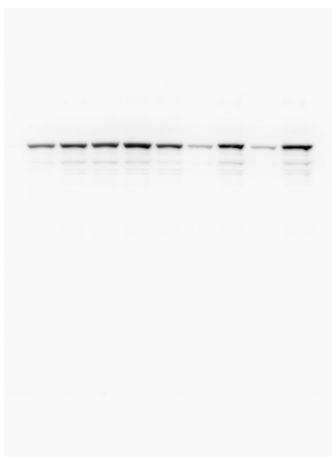

Figure 6b, lower panel

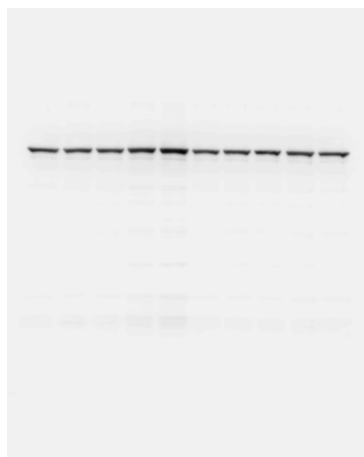

Figure 6d, upper panel

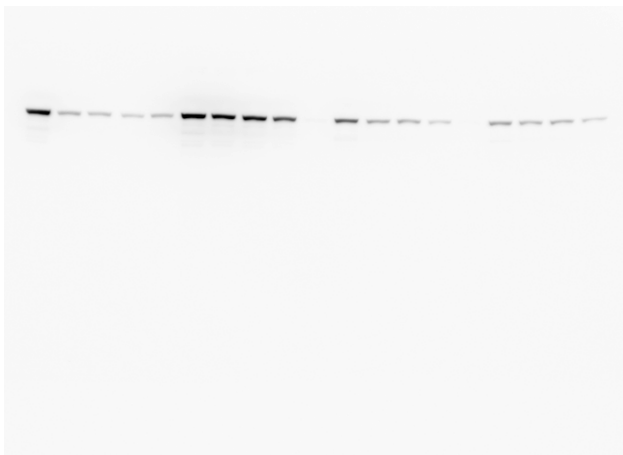

Figure 6d, lower panel

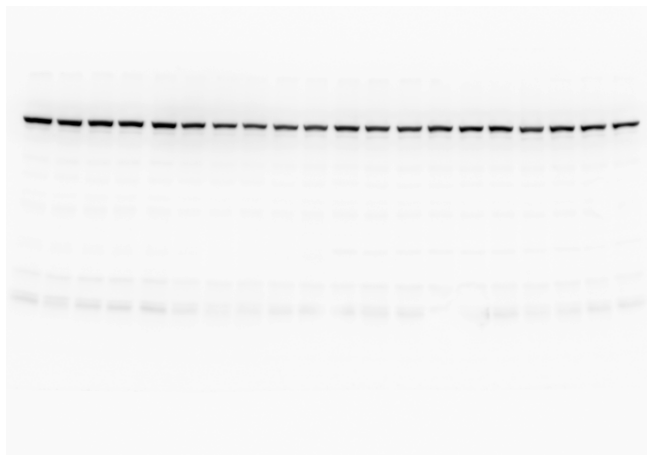

Suppl. figure 4, upper panel

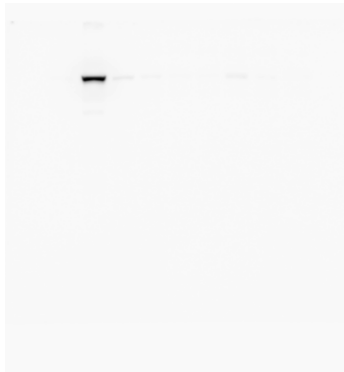

Suppl. figure 4, lower panel

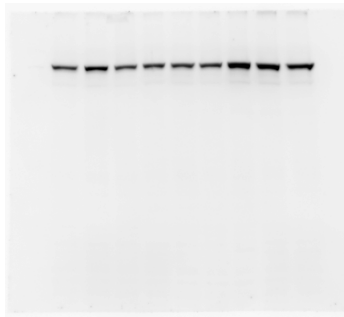

Suppl. figure 5, upper panel

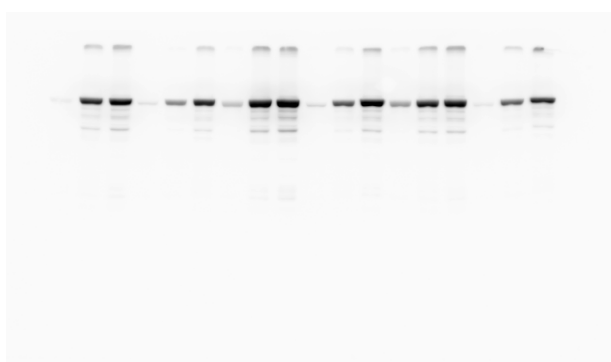

Suppl. figure 5, lower panel

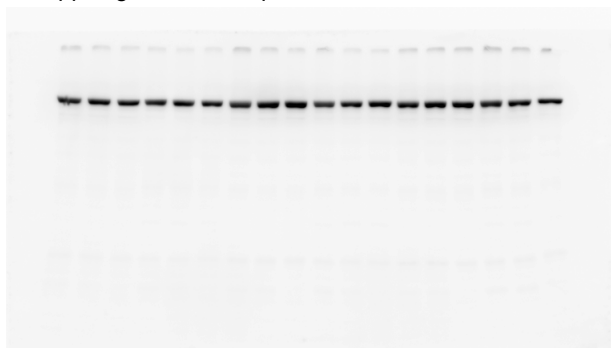

Supplement: srep35454-s1.pdf [file srep35454-s1.pdf]
